# Supplementary material
Source: PubMed Central journal article supplement (PMC9169695)
Supplement: NIHMS1805339-supplement-1.pdf [file NIHMS1805339-supplement-1.pdf]

## METHODS

Chemical lysis was undertaken by adding 200  $\mu$ L of guanidinium thiocyanate-EDTA-sarkosyl and 900  $\mu$ L of PBS to the samples before they underwent bead-beating. Cell disruption was undertaken using Qiagen stainless steel beads and tungsten carbide beads on a Fastprep-24 Instrument (MP Biomedicals Europe, Illkirch, France) running at 6.5 m/s for 45 seconds. Two cycles of thermolysis followed by alternating incubation at 90°C and -20°C for 10 minutes each, before cell debris was pelleted by centrifugation at 13,000g for 10 minutes. Supernatant was transferred to a fresh microfuge tube, where it was inverted with 140  $\mu$ L of 5 molar sodium chloride and 374  $\mu$ L 40% polyethylene glycol and precipitated for 1 hour at 4°C. DNA was pelleted by centrifugation at 13,000g for 10 minutes and resuspended in 500  $\mu$ L of sterile distilled water. Three hundred microliter of phenol/chloroform (1:1) was added and samples were vortexed before centrifugation at 13,000g for 5 minutes. The upper phase was then transferred to a fresh microfuge tube. Total DNA was then precipitated by the addition of an equal volume of isopropanol and 0.1 volume of 10 molar ammonium acetate and stored at -20°C for 1 hour. DNA was pelleted by centrifugation at 13,000g for 10 minutes. Pelleted DNA was washed in 70% ethanol, dried, and resuspended in 30  $\mu$ L of sterile distilled water.<sup>E1,E2</sup>

DNA extracts were amplified using universal bacterial primers targeting the 16S ribosomal RNA gene at hypervariable region V4 (515F-806R), which are tailed with sequences to incorporate Illumina (San Diego, Calif) adapters and indexing barcodes.<sup>E3</sup> Sequencing was performed on the MiSeq instrument using version 2 chemistry and 250 cycles, stratifying the amplicon samples according to 3-, 6-, and 12-month time points between each plate.

## REFERENCES

- E1. Green GL, Brostoff J, Hudspeth B, Michael M, Mylonaki M, Rayment N, et al. Molecular characterization of the bacteria adherent to human colorectal mucosa. *J Appl Microbiol* 2006;100:460-9.
- E2. Rogers GB, Cuthbertson L, Hoffman LR, Wing PA, Pope C, Hooftman DA, et al. Reducing bias in bacterial community analysis of lower respiratory infections. *ISME J* 2013;7:697-706.
- E3. Caporaso JG, Lauber CL, Walters WA, Berg-Lyons D, Lozupone CA, Turnbaugh PJ, et al. Global patterns of 16S rRNA diversity at a depth of millions of sequences per sample. *Proc Natl Acad Sci U S A* 2011;108:4516-22.
- E4. Segata N, Izard J, Waldron L, Gevers D, Miropolsky L, Garrett WS, et al. Metagenomic biomarker discovery and explanation. *Genome Biol* 2011;12:R60.

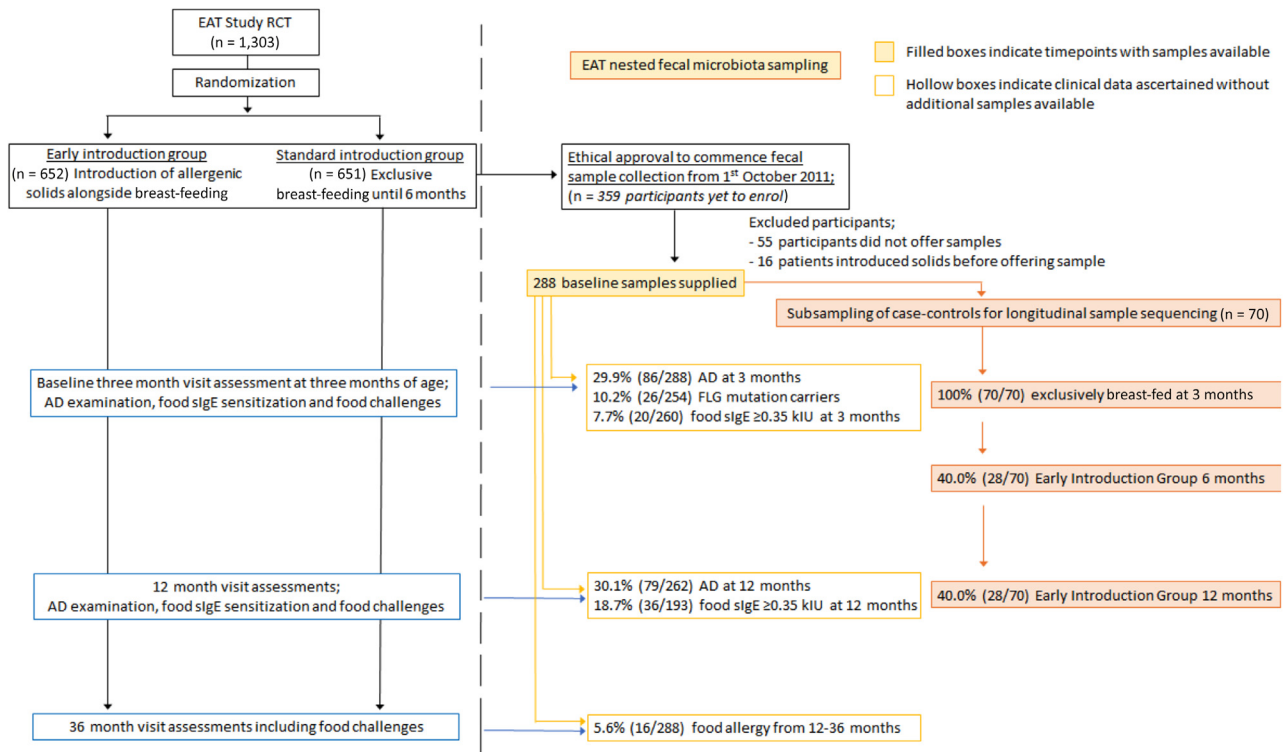

**FIG E1.** Participant flow diagram. Of the potential participants (n = 359) in the nested study, 288 participants provided a baseline (3-month) fecal sample. For the subset of case-control longitudinal sampling (n = 70), participants provided additional fecal samples at 6 and 12 months.

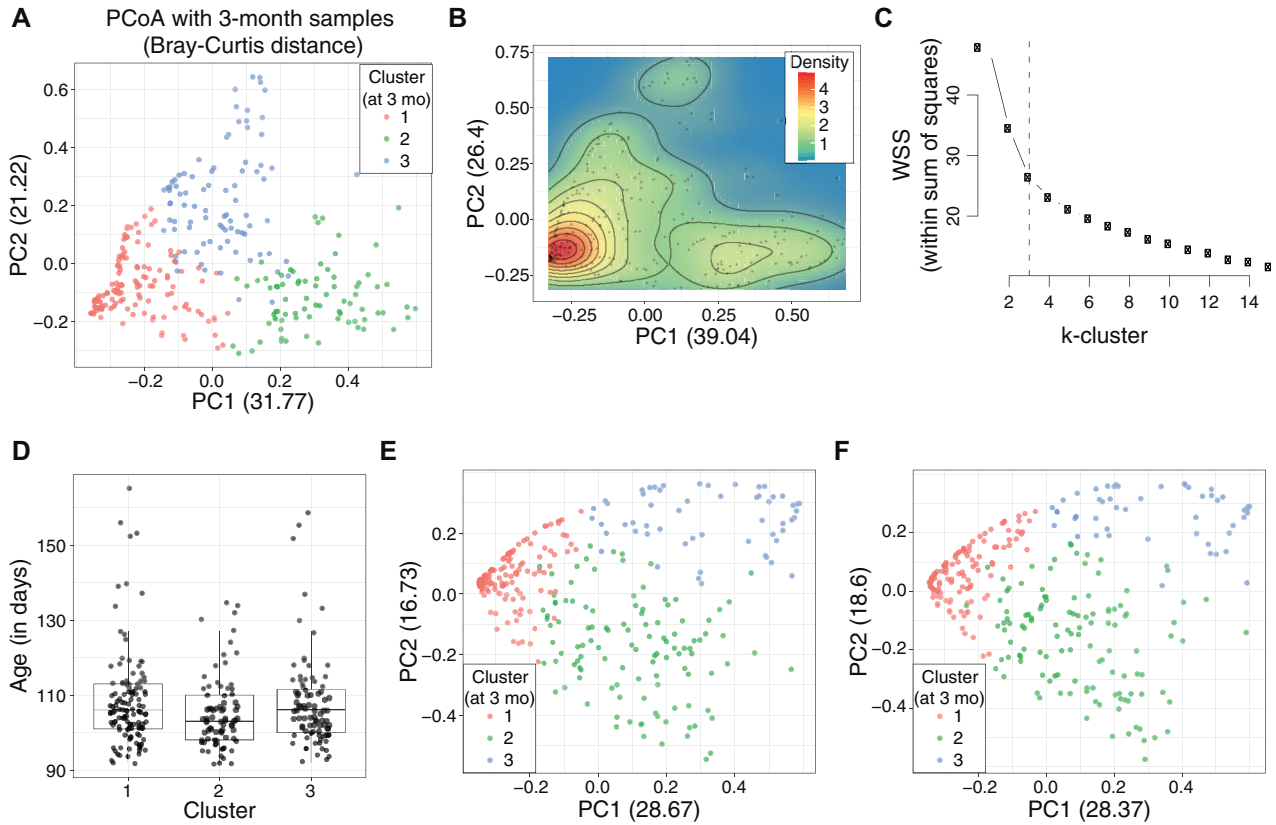

**FIG E2.** Patterns of gut microbiota of baseline fecal samples. **A**, PCoA of the gut microbiome at 3 months. Pair-wise distances (Bray-Curtis distance) among all samples were calculated and 2 major axes (PC1 and PC2) from the multidimensional distance space were calculated and depicted on a scatter plot. Colors indicate different clusters, according to *k*-means clustering. **B**, Density distribution of 3-month-old infants' microbiome based on PCoA (same as Fig 1, A). There are 3 high-density peaks pronounced, suggesting 3 clusters of microbial community populations. **C**, Evaluation of optimal clustering using "within sum of squares" by each *k* (number of clusters). Based on the graphical visualization of within sum of squares or the "elbow method," *k* = 3 (3 clusters) is the optimal number of clusters. Increasing the number of clusters beyond 3 (*k* > 3) results in overfitting, whereas *k* less than 3 is not as effective in minimizing intracluster variation. **D**, Distribution of age (in days) of the infants when their 3-month samples were acquired, grouped by each cluster (*P* = NS; Kruskal-Wallis test). **E**, PCoA of microbiome communities at 3 months with species-level classification. The colors indicate clusters. **F**, PCoA of microbiome communities at 3 months with 97% *de novo* OTU-level classification. The colors indicate clusters. NS, Nonsignificant; OTU, operational taxonomic unit.

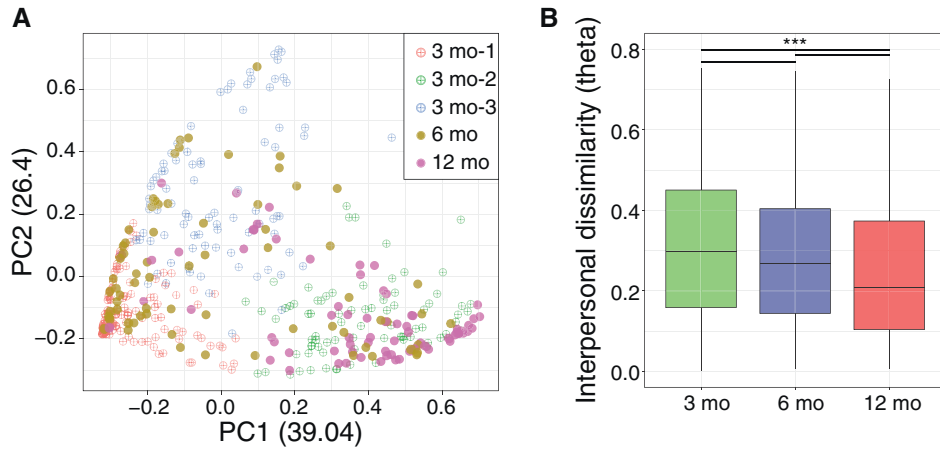

**FIG E3.** Longitudinal changes in the gut microbiome in the EAT study. **A**, Gut microbiota for 6- and 12-month samples was overlaid on the PCoA ordination of the microbiota of 3-month samples (same as Fig 1, A). The colors indicate clustering and age groups. At age 12 months, the microbiota largely converges to cluster 2 of the 3-month gut microbiota. **B**, Boxplot showing changes in interpersonal dissimilarity at different time points. All-to-all theta distances within each age group were calculated and plotted. Lower value (close to 0) indicates communities are more similar.

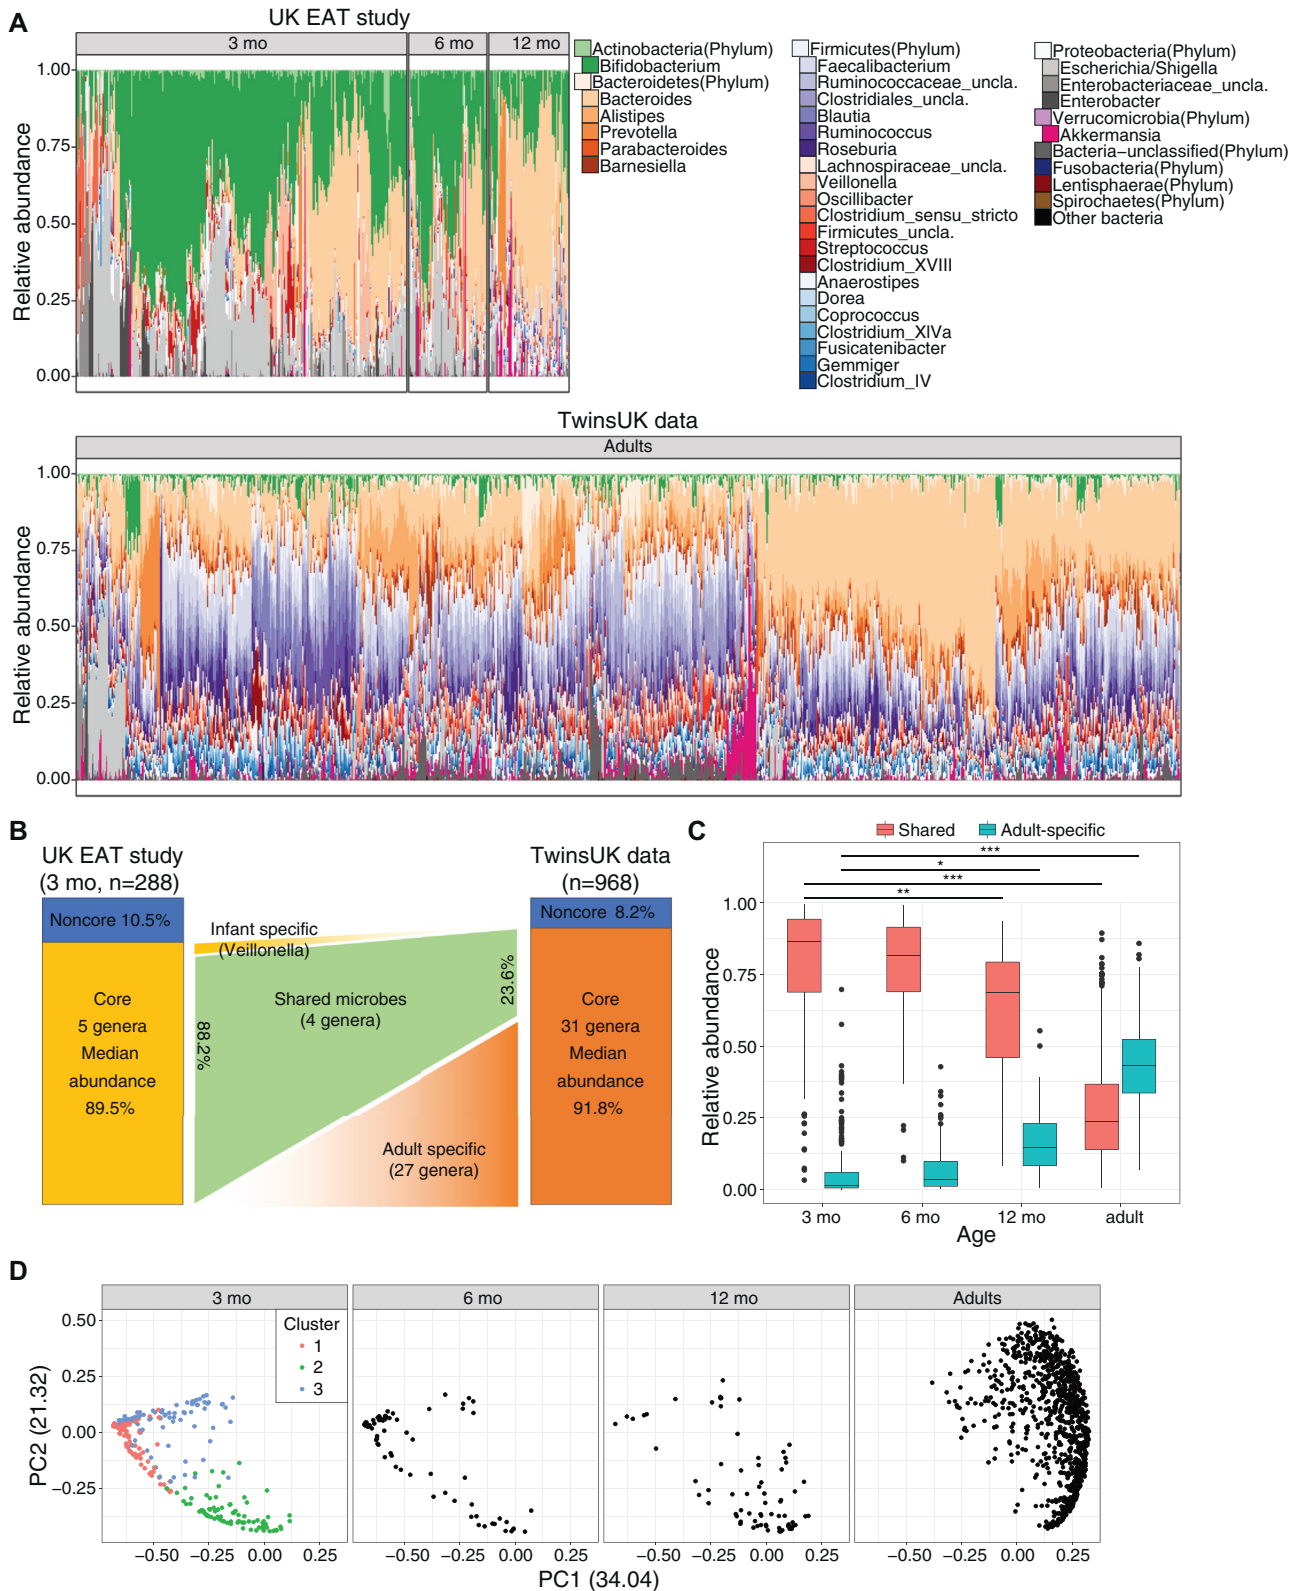

**FIG E4.** Microbiota differences between infants and adults. **A**, Stacked bar charts for relative abundances of major genera in all samples, from both EAT (3, 6, and 12 months) and TwinsUK (adults) cohorts. Each bar indicates an individual. **B**, Schematic diagram describing differences in core/noncore genera between 3-month-old infants and adults. There are 5 core genera (genera exist in more than 95% of individuals, *Bifidobacterium*, *Bacteroides*, *Streptococcus*, *Escherichia/Shigella*, and *Veillonella*) from 3-month-old infants. Among them, 4 genera (except *Veillonella*) are also core in adults. **C**, Boxplot showing relative changes in shared and adult-specific core microbes ( $*P < .05$ ,  $**P < .01$ ,  $***P < .001$ ; Wilcoxon rank-sum test after Kruskal-Wallis test). At 12 months, relative abundances of adult-specific core genera are increased and shared cores are decreased, compared with 3 months. **D**, PCoA plot showing relative changes in gut microbiome during maturation. Twelve-month samples clustered more closely with adults.

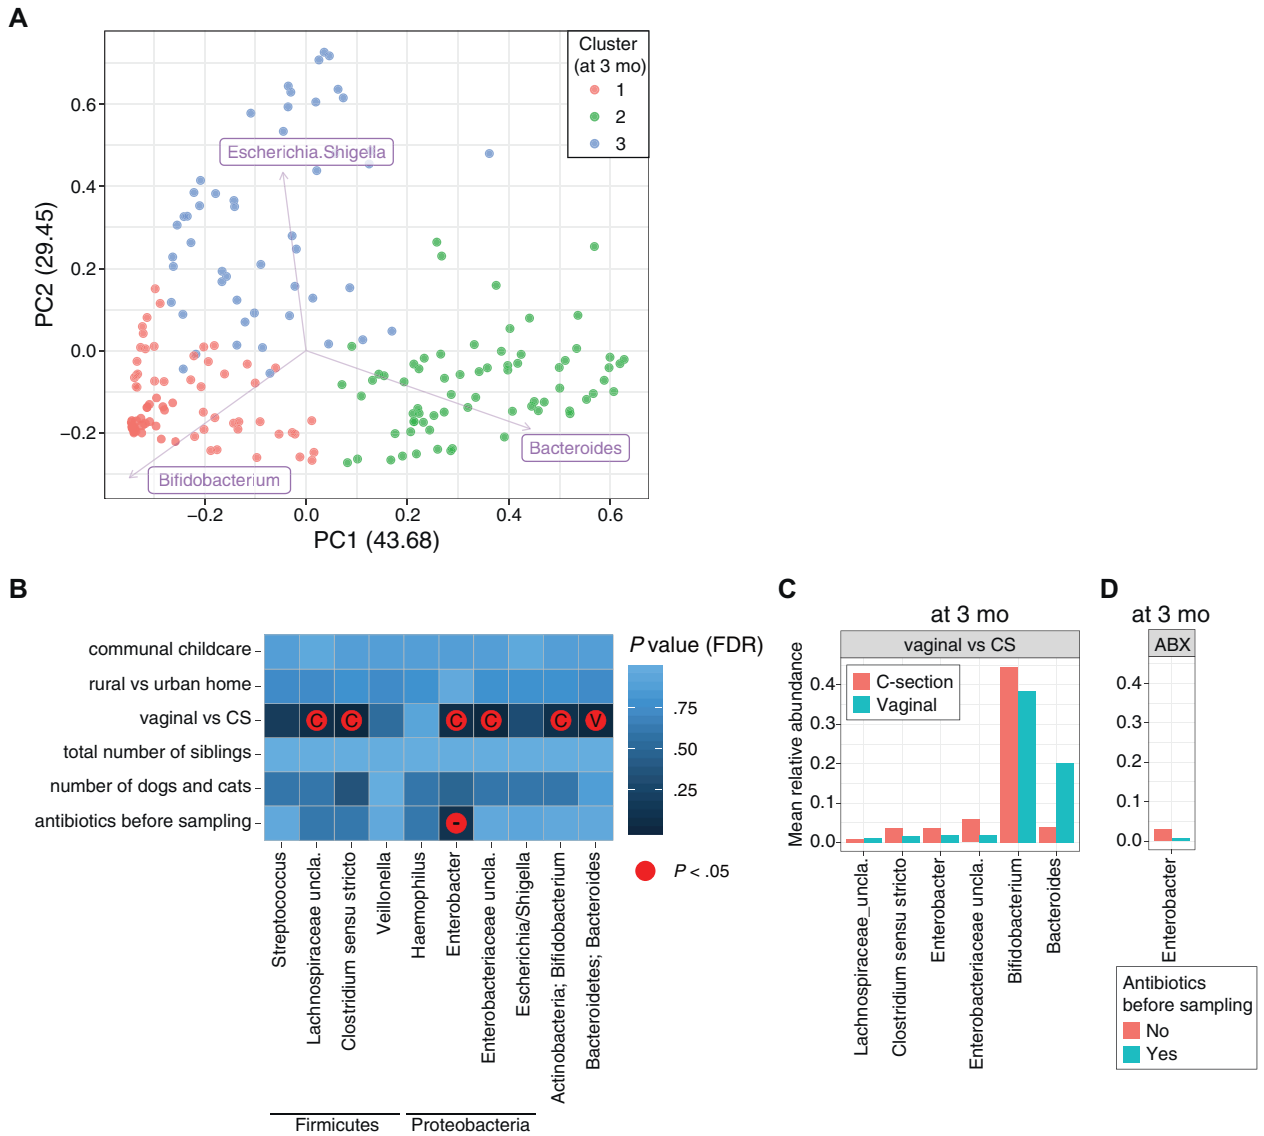

**FIG E5.** A, PCoA of baseline gut microbiota of vaginally born infants. Different colors indicate clusters, and arrows indicate specific genera significantly correlated with PCoA ordination ( $P < .05$ , lengths of arrows are proportional to  $R^2$  (calculated by EnvFit in R)). B, Heatmap showing associations between environmental exposures and microbial composition. Darker colors indicate lower  $P$  values, and red marks indicate associations with FDR-corrected  $P$  values lower than .05. C, Mean relative abundance differences of selected taxa from B (vaginal vs CS). D, Mean relative abundance differences of selected taxa from B (antibiotics before sampling). CS, Cesarean section; FDR, false-discovery rate.

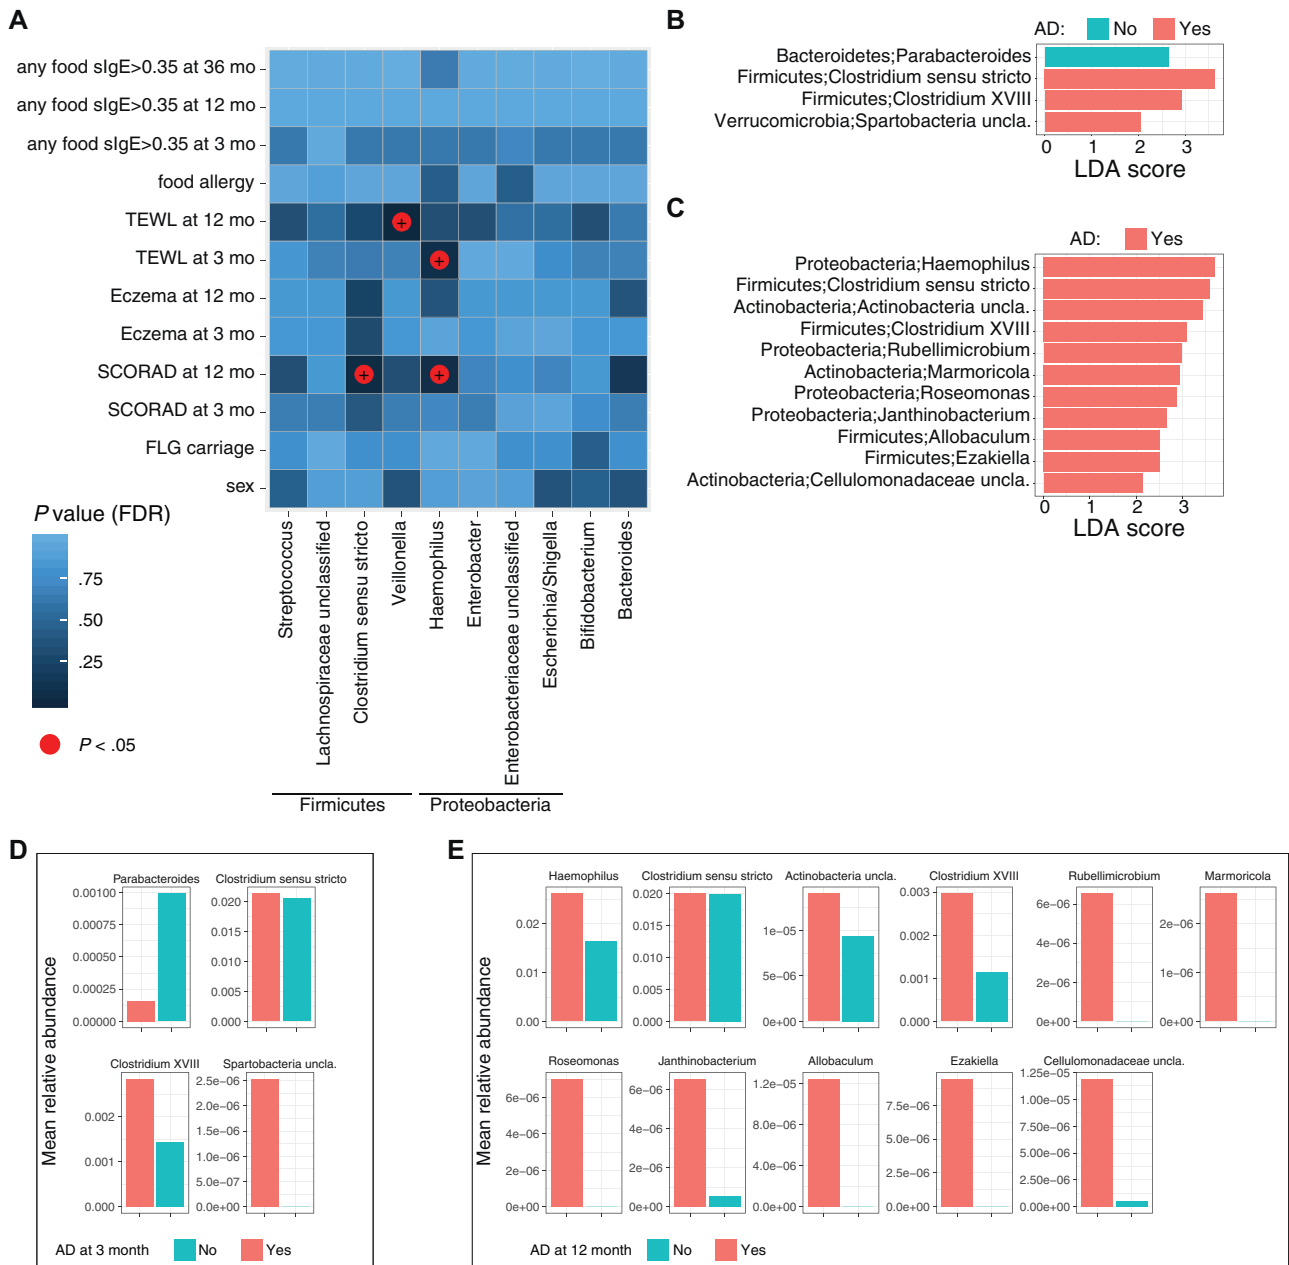

**FIG E6.** Association of clinical measurements with microbial compositions. **A**, Heatmap showing associations between various clinical measurements and microbial composition. Darker colors indicate lower  $P$  values, and red marks indicate associations with FDR-corrected  $P$  values lower than .05. **B**, Discriminatory taxa from 3-month gut microbiota in infants with or without eczema at age 3 months (LDA score). The LDA score is calculated by LEfSe.<sup>E4</sup> **C**, Discriminatory taxa from 3-month gut microbiota in infants with or without eczema at age 12 months. The LDA score is calculated by LEfSe. **D**, Mean relative abundance differences of selected taxa from **B** (with or without eczema at 3 months). **E**, Mean relative abundance differences of selected taxa from **C** (with or without eczema at 12 months). *FDR*, False-discovery rate; *LDA*, linear discriminant analysis; *SCORAD*, SCORing Atopic Dermatitis; *TEWL*, transepidermal water loss.

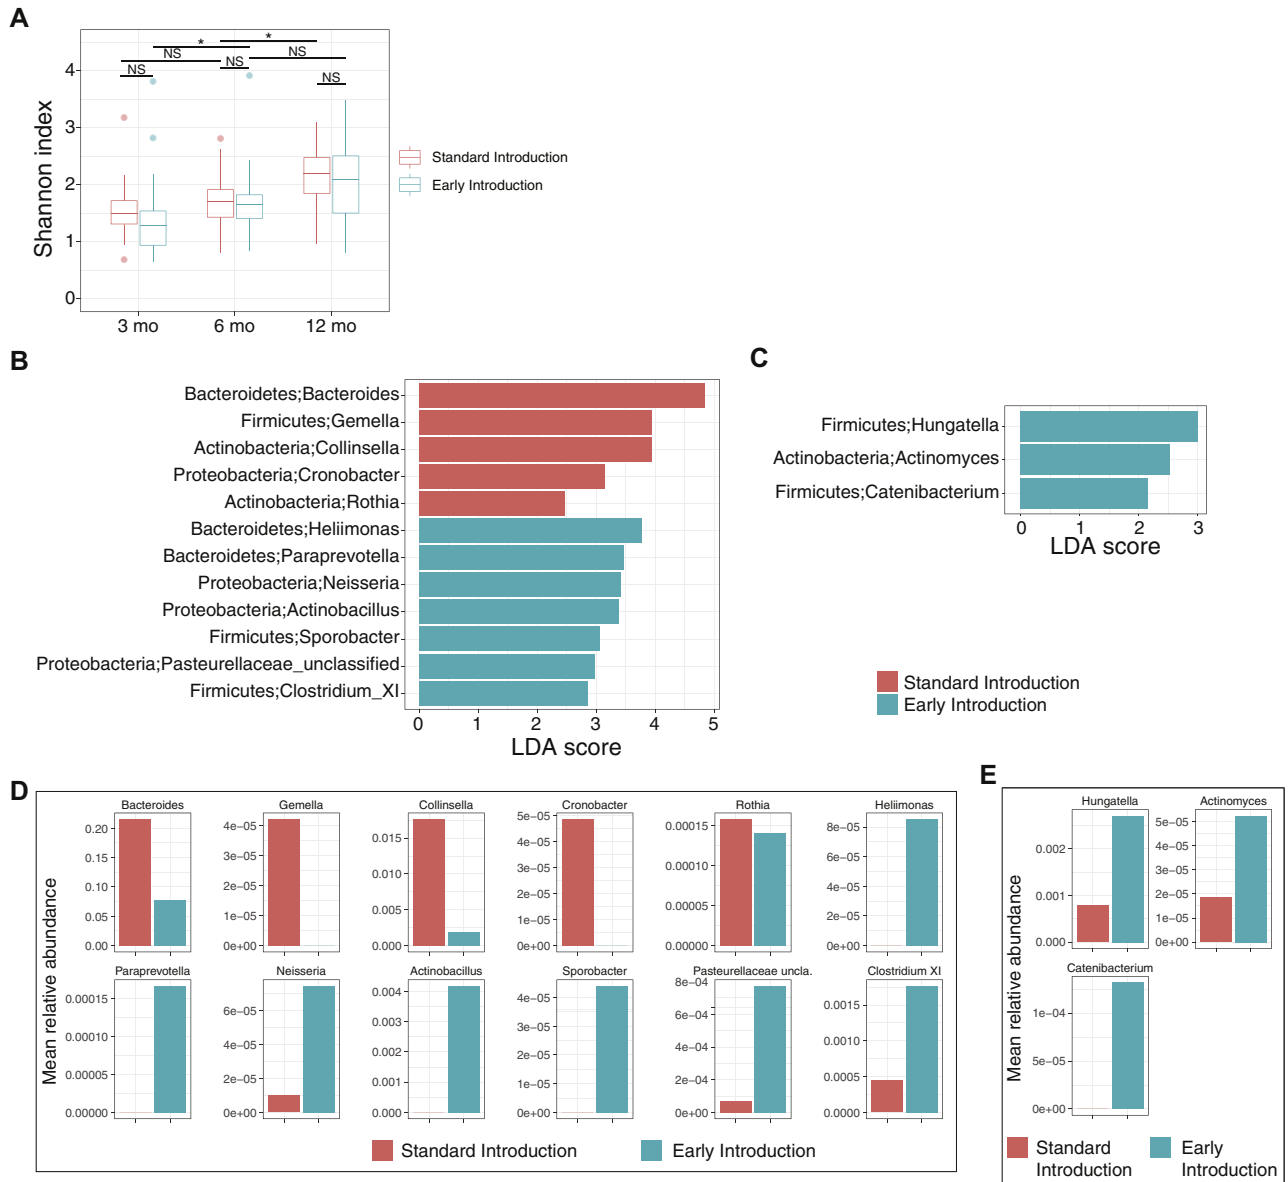

**FIG E7.** Differential microbiota dynamics by early food introduction in the EAT cohort. **A**, Boxplot comparing Shannon diversity changes among participants' longitudinal samples according to randomized allocation to continued exclusive breast-feeding (standard introduction group) or the introduction of allergenic solids (early introduction group). ( $*P < .05$ ; paired Wilcoxon rank-sum test). **B**, Discriminatory taxa from 6-month gut microbiota of infants in standard vs early introduction (LDA score). The LDA score is calculated by LEfSe. **C**, Discriminatory taxa from 12-month gut microbiota of infants in standard vs early introduction (LDA score). The LDA score is calculated by LEfSe. **D**, Mean relative abundance differences of selected taxa from **B** (standard vs early introduction). **E**, Mean relative abundance differences of selected taxa from **C** (standard vs early introduction). *LDA*, Linear discriminant analysis; *NS*, nonsignificant.



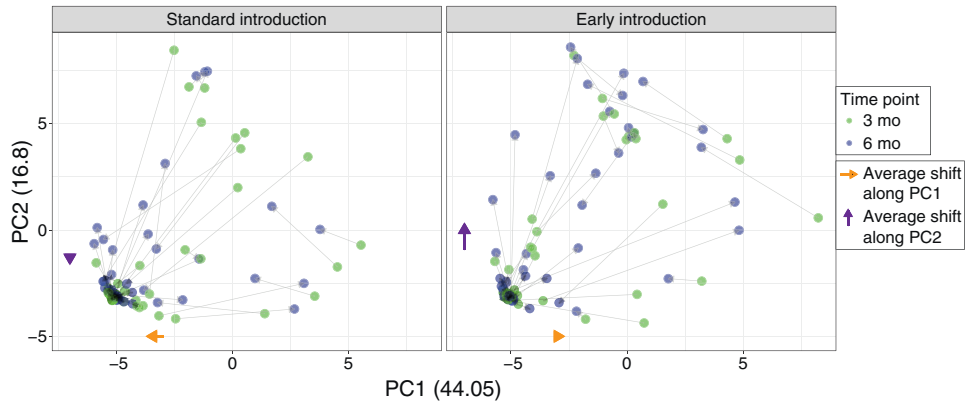

**FIG E8.** Differential microbiota dynamics by early food introduction in the TEDDY cohort. PCoA scatter plot demonstrating longitudinal transition from age 3 to 6 months of defined samples from the TEDDY cohort. From the TEDDY data set, samples from infants who were (i) exclusively breast-fed before solid food introduction and (ii) longitudinal data (>2 sampling before age 6 months) were selected. Gray lines connect samples from the same individual. Yellow and purple arrows on the sides indicate the average shift of the microbiota in the PCoA axes.
